# Supplementary material for: Robust single-cell discovery of RNA targets of RNA binding proteins and ribosomes
Source: Research Square preprint supplement (doi:10.21203/rs.3.rs-87224/v1), 2020-10-13
Supplement: Supplementary file 1 [file cbff54a760f179d487d8afea.xlsx]

## Sheet: Table_S5
Rank	RBFOX2-cluster gene symbols	RBFOX2-cluster log2 fold changes	RBFOX2-cluster p values	RBFOX2-cluster adjusted p values	TIA1-cluster gene symbols	TIA1-cluster log2 fold changes	TIA1-cluster p values	TIA1-cluster adjusted p values
1	PTMA	5.74967	0	0	EEF1A1	5.21816	0	0
2	NPM1	5.94008	0	0	H2AFZ	6.27172	0	0
3	ACTB	6.59401	0	0	RPS15A	3.85563	0	0
4	H2AFZ	5.62834	0	0	NPM1	5.35661	0	0
5	UQCRH	5.79517	0	0	RPS25	4.96054	0	0
6	PPIA	5.48059	0	0	ACTB	6.10137	0	0
7	PRDX1	5.37876	0	0	UQCRH	4.71491	7.22e-272	1.29e-269
8	EEF1A1	2.67308	0	0	BTF3	5.66012	1.53e-270	2.51e-268
9	SLC25A5	5.08104	0	0	PPIA	4.77854	3.64e-269	5.51e-267
10	H3F3A	3.70735	0	0	RPL23A	3.45579	2.98e-242	4.18e-240
11	NGFRAP1	4.72819	0	0	RPS13	3.40953	1.39e-222	1.82e-220
12	HSP90AA1	4.91705	0	0	RPS18	2.1772	1.38e-220	1.7e-218
13	CFL1	4.73858	0	0	PRDX1	4.62273	1.25e-192	1.3e-190
14	PFN1	3.85151	0	0	RPL30	3.01555	3.43e-191	3.37e-189
15	STMN1	4.77526	0	0	ACTG1	3.38916	1.77e-185	1.66e-183
16	RPS25	3.25534	0	0	RPL39	2.05024	2.29e-166	2.05e-164
17	C1QBP	3.41658	0	0	EEF2	3.36391	2.17e-159	1.85e-157
18	RANBP1	4.48973	0	0	PTMA	3.14152	4.73e-140	3.87e-138
19	RAN	3.44639	0	0	RPL27	2.85812	6.52e-131	5.13e-129
20	HMGB1	4.28763	0	0	RPL9	2.8913	6.68e-126	5.05e-124
21	YWHAE	4.44524	0	0	SLC25A5	3.63905	5.46e-115	3.97e-113
22	LDHB	3.33365	0	0	LDHB	3.02742	1.37e-106	9.63e-105
23	RPL41	1.78048	0	1.21e-307	RAN	3.0401	9.13e-102	5.98e-100
24	CKB	2.24603	4.2e-258	2.66e-256	STMN1	3.69676	1.12e-84	6.66e-83
25	RPL30	2.27928	7.02e-248	4.18e-246	RPLP1	1.10845	3.47e-73	1.89e-71
26	CALM2	5.63314	1.06e-226	5.92e-225	YBX1	2.84713	4.48e-71	2.38e-69
27	HNRNPA2B1	3.58238	1.3e-215	7.08e-214	RPS7	1.47092	9.88e-66	5.11e-64
28	FTH1	2.47841	3.39e-198	1.8e-196	RPL41	1.24481	1.18e-65	5.9e-64
29	TOMM5	5.11	4.11e-183	2.07e-181	TPT1	2.39582	1.39e-61	6.68e-60
30	SUB1	4.32006	2.66e-161	1.25e-159	RPS8	1.34075	2.16e-57	1.01e-55
31	UBB	2.31269	4.72e-156	2.11e-154	RPS2	0.644324	2.46e-56	1.12e-54
32	NDUFA4	3.71478	6.64e-148	2.9e-146	CHCHD2	2.71416	1.24e-49	5.43e-48
33	LDHA	2.83107	8.59e-131	3.52e-129	COX6A1	2.59144	5.28e-46	2.26e-44
34	SERF2	2.14995	5.01e-125	2.01e-123	RPS27A	1.37154	6.91e-43	2.89e-41
35	SUMO2	2.57501	4.09e-124	1.61e-122	NACA	1.76393	1.82e-40	7.3e-39
36	PCBP2	4.37004	8.56e-118	3.23e-116	RPS4X	0.910167	1.01e-36	3.89e-35
37	PTGES3	4.57804	6.44e-111	2.3e-109	RPL23	1.65346	5.34e-34	1.98e-32
38	PPA1	3.01048	8.69e-111	3.05e-109	YWHAE	2.49529	2.32e-32	8.44e-31
39	ACTG1	1.71647	2.37e-110	8.17e-109	CKB	1.21914	3.41e-31	1.22e-29
40	TMSB10	2.12264	3.63e-110	1.23e-108	RPL35A	1.44846	1.85e-27	6.27e-26
41	RPL23	1.87557	1.4e-102	4.22e-101	HSP90AA1	2.39249	1.31e-26	4.23e-25
42	CSTB	3.2831	1.36e-91	3.67e-90	TMSB10	1.59085	1.24e-22	3.88e-21
43	HNRNPC	4.40798	1.01e-90	2.67e-89	PFN1	1.74649	1.44e-22	4.43e-21
44	CKS2	4.17179	2.09e-78	5.39e-77	CALM2	3.82427	1.98e-22	6e-21
45	SRP9	3.51511	1.74e-76	4.33e-75	RPL5	0.94828	2.54e-20	7.23e-19
46	DYNLL1	2.6832	5.73e-76	1.41e-74	NGFRAP1	1.69865	8.55e-18	2.37e-16
47	OAZ1	2.06773	1.78e-74	4.31e-73	GABARAP	2.21086	2.22e-17	5.98e-16
48	HMGN1	2.6498	5.06e-74	1.21e-72	UBB	1.19665	4.11e-17	1.09e-15
49	HNRNPH1	8.06819	6.37e-74	1.51e-72	VIM	2.05017	5.9e-17	1.55e-15
50	HSP90AB1	2.27483	2.44e-73	5.71e-72	RPL10A	1.05506	9.85e-17	2.55e-15
51	SRP14	2.26749	6.51e-73	1.49e-71	FTH1	1.18503	4.56e-16	1.15e-14
52	BANF1	4.32052	4.87e-70	1.1e-68	RPL26	0.698749	2.07e-15	5.03e-14
53	COX6A1	1.96024	8.48e-67	1.89e-65	PPA1	2.06548	6.24e-15	1.48e-13
54	YBX1	1.63206	4.74e-66	1.05e-64	TPI1	1.4719	2.03e-14	4.7e-13
55	NEDD8	2.85162	1.74e-60	3.67e-59	TXN	1.70997	4.85e-14	1.11e-12
56	TXN	2.00651	3e-60	6.27e-59	RPL15	0.564998	5.88e-14	1.33e-12
57	HINT1	1.86684	1.05e-52	2.02e-51	HMGB1	1.79192	1.17e-12	2.59e-11
58	SPCS1	2.56426	9.42e-50	1.76e-48	CFL1	1.58343	1.03e-11	2.25e-10
59	CHCHD2	1.74135	4.04e-48	7.5e-47	RPL6	0.747591	1.98e-11	4.18e-10
60	DDT	2.04566	1.28e-44	2.33e-43	RPS14	0.51354	2.14e-09	4.12e-08
61	GNAS	1.5955	1.8e-44	3.25e-43	RPL22	0.884108	5.86e-08	1.07e-06
62	ATP5G3	1.78631	2.02e-44	3.6e-43	HINT1	1.08783	3.18e-07	5.49e-06
63	HMGN2	1.84447	1.89e-39	3.26e-38	RPS11	0.578925	5.26e-07	8.76e-06
64	SET	3.0188	1.7e-35	2.83e-34	PCBP2	2.51478	1.43e-06	2.33e-05
65	SRSF9	2.9788	2.81e-34	4.64e-33	RPL11	0.457602	2.64e-06	4.19e-05
66	H3F3B	2.40892	3.21e-34	5.25e-33	HNRNPC	2.63098	7.22e-06	0.000112639
67	PSMA2	2.92878	9.19e-34	1.49e-32	SERF2	0.771742	2.09e-05	0.000321402
68	RPL7	0.940263	1.45e-31	2.32e-30	SEC11A	2.37256	3.57e-05	0.000544219
69	CYCS	3.72935	6.78e-31	1.07e-29	DDT	1.15188	3.9e-05	0.000589771
70	UQCR10	1.38946	2.97e-29	4.66e-28	TSC22D3	2.83024	4.8e-05	0.000719326
71	SNRPB	1.55597	3.7e-27	5.64e-26	MRPS24	1.48083	5.96e-05	0.000880889
72	ERH	3.14555	1.4e-25	2.11e-24	TOMM5	2.29857	0.000104379	0.00150812
73	TUBB	1.02098	9.66e-23	1.41e-21	PSMA2	1.99814	0.000270136	0.00381883
74	MARCKSL1	1.38852	1.2e-21	1.73e-20	COX7C	0.810302	0.000279582	0.00392413
75	HMGN3	4.4481	7.51e-19	1.03e-17	ATP5G3	0.888478	0.000827141	0.0110567
76	BTF3	1.21179	1.38e-18	1.87e-17	SRSF9	1.8613	0.00172742	0.0220414
77	SKP1	3.67068	1.43e-18	1.93e-17	RPS29	0.549141	0.00193694	0.0245554
78	B2M	2.74449	2.63e-18	3.51e-17	LDHA	0.795942	0.00290487	0.036127
79	GABARAP	1.50318	3.05e-18	4.04e-17	HNRNPH1	5.42977	0.00408971	0.0496067
80	ARPC3	1.70913	4.45e-18	5.86e-17	SRP9	1.51511	0.00443357	0.0531217
81	TPI1	0.945093	4.21e-17	5.52e-16	HNRNPA2B1	0.874699	0.00522508	0.0614807
82	SEC11A	2.49413	5.62e-16	7.26e-15	RPS17L	0.486201	0.0118114	0.132625
83	KIAA0101	2.80077	1.99e-15	2.54e-14	RANBP1	0.925659	0.0121928	0.134237
84	EIF5A	1.47144	2.95e-15	3.75e-14	RPL37A	0.241655	0.0183826	0.19359
85	SNRPE	1.77318	9.9e-15	1.23e-13	RPL7	0.329421	0.0217736	0.226377
86	TOMM6	0.998182	5.3e-14	6.46e-13	H3F3B	1.01254	0.0234243	0.240988
87	SOD1	1.56891	6.05e-14	7.34e-13	CKS2	1.65156	0.0239282	0.24489
88	GTF2H5	3.29102	1.35e-13	1.62e-12	PTGES3	1.64887	0.0248779	0.251985
89	ARF5	2.19279	3.08e-12	3.54e-11	BANF1	1.53346	0.048784	0.456397
90	PEBP1	1.93647	3.39e-11	3.87e-10	HSPD1	1.02869	0.0490075	0.456397
91	CLTA	2.39874	6.72e-11	7.59e-10	HNRNPAB	1.72877	0.0626416	0.572515
92	C14orf2	1.29843	8.5e-11	9.49e-10	NEDD8	0.821123	0.063972	0.579946
93	RPL34	0.476476	2.04e-10	2.27e-09	SLC25A3	0.463945	0.0643401	0.579946
94	DBI	2.34334	1.48e-08	1.59e-07	H3F3A	0.359066	0.0685359	0.61215
95	PSMA1	3.25731	4.52e-08	4.73e-07	EIF4A1	0.34444	0.106385	0.882052
96	LSM5	3.02905	1.46e-07	1.51e-06	RPS24	0.175244	0.113875	0.931287
97	NCL	2.33242	1.68e-07	1.72e-06	MINOS1	0.779423	0.135842	0.999287
98	MINOS1	1.2928	5.86e-07	5.91e-06	RPL3	0.0839048	0.137411	0.999287
99	RBX1	2.00355	5.99e-07	6e-06	HMGB2	0.976685	0.183383	0.999287
100	MAD2L1	2.38212	6.82e-07	6.8e-06	SET	0.964744	0.209483	0.999287
